# Supplementary material
Source: HighWire-hosted journal article supplement (https://jnm.snmjournals.org/highwire/filestream/95188/field_highwire_adjunct_files/0/192476_Supplemental_Data.pdf)
Supplement: 192476_Supplemental_Data.pdf [file 192476_Supplemental_Data.pdf]

| Post-imaging Treatment           |                     |                           |                                  |              |                                 |                       |                                 |                             |           |
|----------------------------------|---------------------|---------------------------|----------------------------------|--------------|---------------------------------|-----------------------|---------------------------------|-----------------------------|-----------|
| Pre-imaging Treatment            | Active surveillance | Abiraterone/ Enzalutamide | ADT for hormone dependent cancer | Chemotherapy | Modify dose of existing therapy | Bone targeted therapy | External-beam radiation therapy | Surgery (LN dissection etc) | Other     |
| Active surveillance              | no change           | MAJOR                     | MAJOR                            | MAJOR        | not applicable                  | MAJOR                 | MAJOR                           | MAJOR                       | unknown   |
| Abiraterone/ Enzalutamide        | MAJOR               | no change                 | MAJOR                            | MAJOR        | minor                           | MAJOR                 | MAJOR                           | MAJOR                       | unknown   |
| ADT for hormone dependent cancer | MAJOR               | MAJOR                     | no change                        | MAJOR        | minor                           | MAJOR                 | MAJOR                           | MAJOR                       | unknown   |
| Chemotherapy                     | MAJOR               | MAJOR                     | MAJOR                            | no change    | minor                           | MAJOR                 | MAJOR                           | MAJOR                       | unknown   |
| Modify dose of existing therapy  | not applicable      | minor                     | minor                            | minor        | no change                       | minor                 | minor                           | not applicable              | unknown   |
| Bone targeted therapy            | MAJOR               | MAJOR                     | MAJOR                            | MAJOR        | minor                           | no change             | MAJOR                           | MAJOR                       | unknown   |
| External-beam radiation therapy  | MAJOR               | MAJOR                     | MAJOR                            | MAJOR        | minor                           | MAJOR                 | no change                       | MAJOR                       | unknown   |
| Surgery (LN dissection etc)      | MAJOR               | MAJOR                     | MAJOR                            | MAJOR        | not applicable                  | MAJOR                 | MAJOR                           | no change                   | unknown   |
| Other                            | unknown             | unknown                   | unknown                          | unknown      | unknown                         | unknown               | unknown                         | unknown                     | no change |
